# Supplementary material for: Lipid Droplets Accumulation in the Brain of HIV Transgenic Rat: Implication in the Accelerated Aging of HIV Infected Individuals
Source: PubMed Central journal article supplement (PMC11745453; doi:10.14336/ad.2024.0125), 2024-01-25
Supplement: AD-16-1-454-s.pdf [file AD-16-1-454-s.pdf]

SUPPLEMENTARY DATA

**Lipid Droplets Accumulation in the Brain of HIV  
Transgenic Rat: Implication in the Accelerated Aging of  
HIV Infected Individuals**

**Ming-Lei Guo, Yan Cheng, Damian Martinez Pineda, Rachael E. Dempsey, Lifang Yang**

# SUPPLEMENTARY DATA

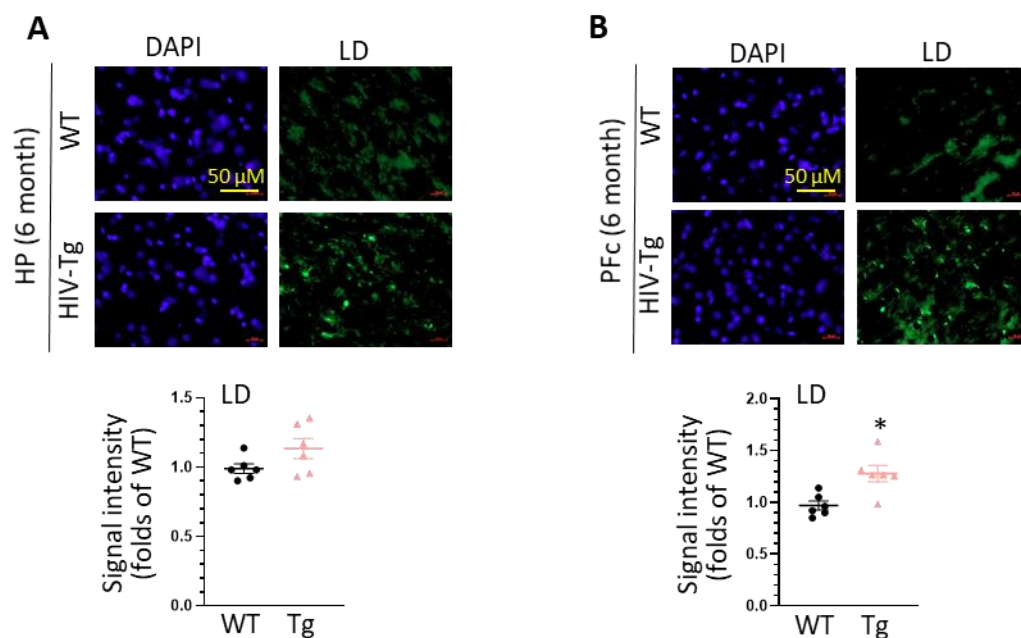

**Supplementary Figure 1.** LDs accumulation in the brains of WT and HIV-Tg rats at 6-month old: **(A)** LDs accumulation in the HP of WT and HIV-Tg rats (scale bar = 50  $\mu$ m,  $P = 0.08$ ); **(B)** LDs accumulation in the PFC of WT and HIV-Tg rats at 6-month old (scale bar = 50  $\mu$ m, \*  $P < 0.05$ ); Each group contains 3 rats and two slices were selected from each rat ( $n = 6$ ), unpaired two tail t-test was used for statistical analysis.

# SUPPLEMENTARY DATA

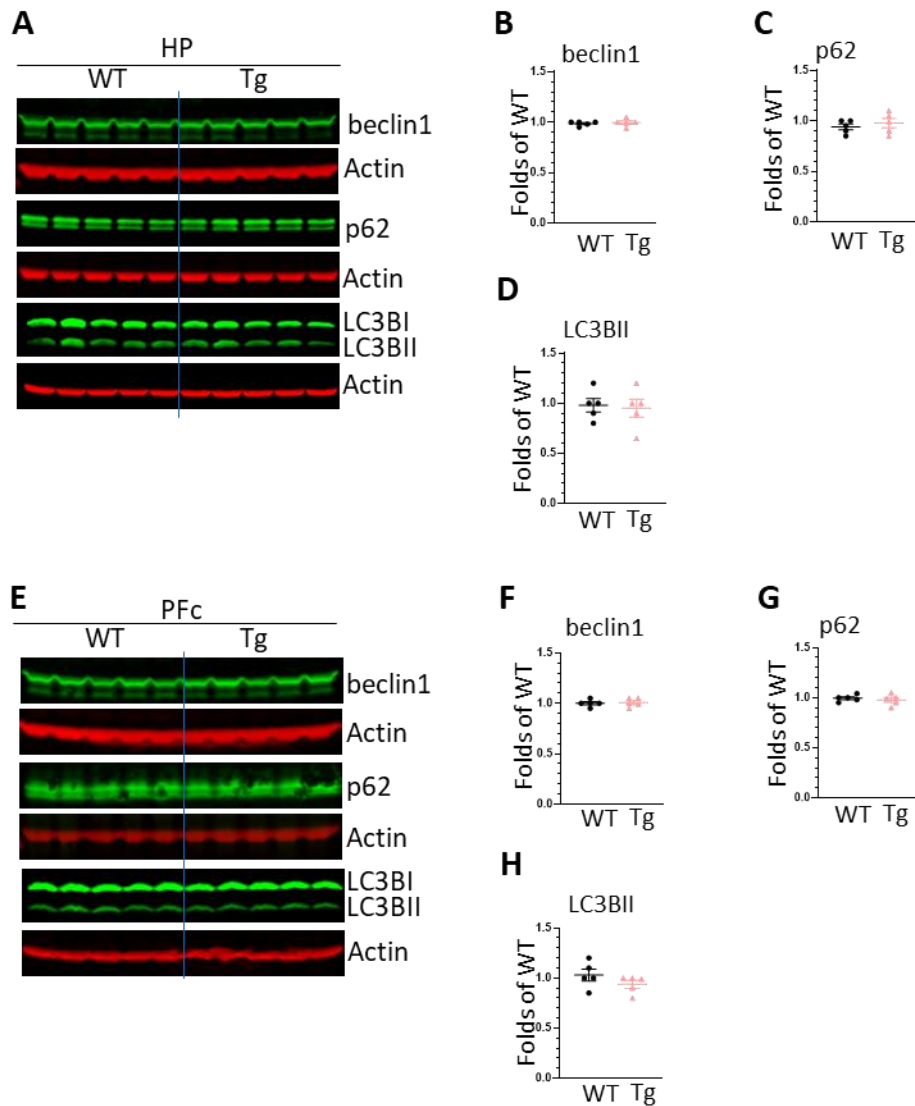

**Supplementary Figure 2.** The expression of autophagy-related molecules in the brains of WT and HIV-Tg rats (12 month old): **(A)** WBs images showing the expression of beclin1, p62, and LC3B in the HP of WT and HIV-Tg rats; **(B)** statistical analysis of beclin1 levels in the HP of WT and HIV-Tg rats; **(C)** statistical analysis of p62 levels in the HP of WT and HIV-Tg rats; **(D)** statistical analysis of LC3BII levels in the HP of WT and HIV-Tg rats; **(E)** WBs images showing the expression of beclin1, p62, LC3B in the PFC of WT and HIV-Tg rats; **(F)** statistical analysis of beclin1 levels in the PFC of WT and HIV-Tg rats; **(G)** statistical analysis of p62 levels in the PFC of WT and HIV-Tg rats; **(H)** statistical analysis of Tau levels in the PFC of WT and HIV-Tg rats. Each group contains 5 rats, unpaired two tail t-test was used for statistical analysis.
